---

# Erratum

Miles JM, Leiter L, Hollander P, Wadden T, Anderson JW, Doyle M, Foreyt J, Aronne L, Klein S: Effect of orlistat in overweight and obese patients with type 2 diabetes treated with metformin. *Diabetes Care* 25:1123–1128, 2002

On page 1123 of the above-listed article, two lines below the abstract heading RESEARCH DESIGN AND METHODS, “ $n = 249$ ” should be changed to “ $n = 250$ ,” as correctly stated in RESULTS on page 1124. The correct sentence should read as follows:

A 1-year multicenter, randomized, double-blind, placebo-controlled trial of 120 mg orlistat t.i.d. ( $n = 250$ ) or placebo ( $n = 254$ ) combined with a reduced-calorie diet was conducted in overweight and obese patients with suboptimal control of type 2 diabetes.
